# Supplementary material for: Influence of Maternal Habitat on Salinity Tolerance of Zygophyllum coccineum with Regard to Seed Germination and Growth Parameters
Source: PubMed Central journal article supplement (PMC7694771; doi:10.3390/plants9111504), 2020-11-06
Supplement: plants-09-01504-s001.pdf [file plants-09-01504-s001.pdf]

# Influence of Maternal Habitat On Salt Tolerance During Germination and Growth in *Zygophyllum coccineum*

Elsayed Mohamed <sup>1,\*</sup>, Ahmed M. M. A. Kasem <sup>1</sup>, Adil A. Gobouri <sup>2</sup>, Amr Elkelish <sup>3</sup> and Ehab Azab <sup>4,5</sup>

1 Botany & Microbiology Department, Faculty of Science (Assiut), Al-Azhar University, Assiut 71524, Egypt; amkasem@azhar.edu.eg

2 Department of Chemistry, College of Science, Taif University, P.O. Box 11099, Taif 21944, Saudi Arabia; a.gobouri@tu.edu.sa

3 Botany Department, Faculty of Science, Suez Canal University Ismailia, Ismailia 41522, Egypt; amr.elkelish@science.suez.edu.eg

4 Department of Biotechnology, College of Science, Taif University, P.O. Box 11099, Taif 21944, Saudi Arabia; e.azab@tu.edu.sa

5 Botany and Microbiology Department, Faculty of Science, Zagazig University, Zagazig, 44519 - Sharkia-Egypt

\* Correspondence: sayedmohamed@azhar.edu.eg; Tel.: (+20-100-854-7019)

**Table S1.** Correlation coefficient between germination, seedling growth biochemical parameter in *Z. coccineum* from Manzala, Wadi Asyuti and Wadi Houf under salinity condition.

| Location            | Parameters         | Germination    | Index          | Recovery       | Length         | Area           | Chla           | Chlb     | Carotenoids    | Chla/Chlb      |
|---------------------|--------------------|----------------|----------------|----------------|----------------|----------------|----------------|----------|----------------|----------------|
| <b>Manzal</b>       | <b>Germination</b> | 1              | <b>0.997**</b> | -0.990**       | <b>0.853**</b> | <b>0.690*</b>  | -0.051-        | 0.117    | -0.673*        | -0.347         |
|                     | <b>Index</b>       | <b>0.997**</b> | 1              | -0.982**       | <b>0.871**</b> | <b>0.707*</b>  | -0.037-        | 0.102    | -0.679*        | -0.327         |
|                     | <b>Recovery</b>    | -0.990**       | -0.982**       | 1              | -0.829**       | -0.705*        | -0.003-        | -0.140   | <b>0.669*</b>  | 0.351          |
|                     | <b>Length</b>      | <b>0.853**</b> | <b>0.871**</b> | -0.829**       | 1              | <b>0.829**</b> | 0.153          | 0.219    | -0.834**       | -0.351         |
|                     | <b>Area</b>        | <b>0.690*</b>  | <b>0.707*</b>  | -0.705*        | <b>0.829**</b> | 1              | 0.355          | 0.474    | -0.860**       | -0.547         |
|                     | <b>Chla</b>        | -0.051-        | -0.037-        | -0.003-        | 0.153          | 0.355          | 1              | 0.279    | -0.075         | 0.039          |
|                     | <b>Chlb</b>        | 0.117          | 0.102          | -0.140-        | 0.219          | 0.474          | 0.279          | 1        | -0.513         | -0.901**       |
|                     | <b>Carotenoids</b> | -0.673*        | -0.679*        | <b>0.669*</b>  | -0.834**       | -0.860**       | -0.075-        | -0.513   | 1              | <b>0.653*</b>  |
|                     | <b>Chla/Chlb</b>   | -0.347-        | -0.327-        | 0.351          | -0.351-        | -0.547-        | 0.039          | -0.901** | <b>0.653*</b>  | 1              |
| <b>Wadi Assiuty</b> | <b>Germination</b> | 1              | <b>0.992**</b> | -0.992**       | <b>0.968**</b> | <b>0.838**</b> | 0.448          | -0.091   | -0.842**       | 0.092          |
|                     | <b>Index</b>       | <b>0.992**</b> | 1              | -0.980**       | <b>0.968**</b> | <b>0.810**</b> | 0.380          | -0.071   | -0.816**       | 0.019          |
|                     | <b>Recovery</b>    | -0.992**       | -0.980**       | 1              | -0.962**       | -0.816**       | -0.451         | 0.101    | <b>0.818**</b> | -0.117         |
|                     | <b>Length</b>      | <b>0.968**</b> | <b>0.968**</b> | -0.962**       | 1              | <b>0.857**</b> | 0.494          | -0.128   | -0.814**       | 0.137          |
|                     | <b>Area</b>        | <b>0.838**</b> | <b>0.810**</b> | -0.816**       | <b>0.857**</b> | 1              | <b>0.521</b>   | -0.256   | -0.935**       | 0.308          |
|                     | <b>Chla</b>        | 0.448          | 0.380          | -0.451-        | 0.494          | 0.521          | 1              | -.188-   | -0.411         | <b>0.508</b>   |
|                     | <b>Chlb</b>        | -0.091-        | -0.071-        | 0.101          | -0.128-        | -0.256-        | -0.188-        | 1        | 0.031          | <b>0.822**</b> |
|                     | <b>Carotenoids</b> | -0.842**       | -0.816**       | <b>0.818**</b> | -0.814**       | -0.935**       | -0.411         | .031     | 1              | -0.126-        |
|                     | <b>Chla/Chlb</b>   | <b>0.092</b>   | 0.019          | -0.117         | 0.137          | 0.308          | <b>0.508</b>   | -0.822** | -0.126-        | 1              |
| <b>Wadi Houf</b>    | <b>Germination</b> | 1              | <b>0.987**</b> | -0.979**       | <b>0.986**</b> | <b>0.934**</b> | 0.490          | -0.071-  | -0.560-        | <b>0.586*</b>  |
|                     | <b>Index</b>       | <b>0.987**</b> | 1              | -0.965**       | <b>0.968**</b> | <b>0.957**</b> | <b>0.530</b>   | -0.067-  | -0.496-        | <b>0.633*</b>  |
|                     | <b>Recovery</b>    | -0.979**       | -0.965**       | 1              | -0.961**       | -0.891**       | -0.442-        | 0.165    | 0.476          | -0.572-        |
|                     | <b>Length</b>      | <b>0.986**</b> | <b>0.968**</b> | -0.961**       | 1              | <b>0.900**</b> | 0.471          | -0.132-  | -0.536-        | <b>0.610*</b>  |
|                     | <b>Area</b>        | <b>0.934**</b> | <b>0.957**</b> | -0.891**       | <b>0.900**</b> | 1              | <b>0.577*</b>  | -0.023-  | -0.522-        | <b>0.670*</b>  |
|                     | <b>Chla</b>        | 0.490          | <b>0.530</b>   | -0.442-        | 0.471          | <b>0.577*</b>  | 1              | 0.479    | 0.194          | <b>0.846**</b> |
|                     | <b>Chlb</b>        | -0.071-        | -0.067-        | 0.165          | -0.132-        | -0.023-        | 0.479          | 1        | 0.007          | -0.049-        |
|                     | <b>Carotenoids</b> | -0.560-        | -0.496-        | 0.476          | -0.536-        | -0.522-        | 0.194          | 0.007    | 1              | 0.198          |
|                     | <b>Chla/Chlb</b>   | <b>0.586*</b>  | <b>0.633*</b>  | -0.572-        | <b>0.610*</b>  | <b>0.670*</b>  | <b>0.846**</b> | -0.049-  | 0.198          | 1              |

\*\* Correlation is significant at the 0.01 level (2-tailed); \* Correlation is significant at the 0.05 level (2-tailed).
